# Supplementary material
Source: ML conference proceedings conference paper supplement (https://proceedings.neurips.cc/paper_files/paper/2011/hash/500e75a036dc2d7d2fec5da1b71d36cc-Abstract.html)
Supplement: Supplementary file [file 500e75a036dc2d7d2fec5da1b71d36cc-Supplemental.zip]

## A Proofs related to OMPR: Exact Recovery Case

Let us denote the objective function by  $f(x) = \frac{1}{2}\|Ax - b\|^2$ . Let  $I_t$  denote the support set of  $x^t$  and  $I^*$  be the support set of  $x^*$ . Define the sets

$$\begin{aligned} FA_t &= I_t \setminus I^* && \text{(false alarms)} \\ MD_t &= I^* \setminus I_t && \text{(missed detections)} \\ CO_t &= I_t \cap I^* && \text{(correct detections)}. \end{aligned}$$

As the algorithms proceed, elements move in and out of the current set  $I_t$ . Let us give names to the set of found and lost elements as we move from  $I_t$  to  $I_{t+1}$ :

$$\begin{aligned} F_t &= I_{t+1} \setminus I_t && \text{(found)} \\ L_t &= I_t \setminus I_{t+1} && \text{(lost)}. \end{aligned}$$

We first state two technical lemmas that we will need. These can be found in [19].

**Lemma 13.** *For any  $S \subset [n]$ , we have,*

$$\|I - A_S^T A_S\| \leq \delta_{|S|}.$$

**Lemma 14.** *For any  $S, T \subset [n]$  such that  $S \cap T = \emptyset$ , we have,*

$$\|A_S^T A_T\|_2 \leq \delta_{|S \cup T|}.$$

### Proof of Theorem 4

**Lemma 15.** *Let  $\delta_{2k} < 1 - \frac{1}{2\eta}$ ,  $f(x^t) > 0$ . Then, in OMPR ( $l$ ),*

$$0 < 2(2\eta - \frac{1}{1 - \delta_{2k}})f(x^t) \leq \|z_{MD_t}^{t+1}\|^2 - \|x_{FA_t}^t\|^2.$$

*Proof.* Since  $x_{I_t}^t$  is the solution to the least squares problem  $\min_x \|A_{I_t}x - b\|^2$ ,

$$A_{I_t}^T (A_{I_t} x_{I_t}^t - b) = \mathbf{0}. \quad (6)$$

Now, note that

$$\begin{aligned} f(x^t) &= \frac{1}{2} \|A_{I_t} x_{I_t}^t - A_{I^*} x_{I^*}^*\|^2, \\ &= \frac{1}{2} ((x_{I_t}^t)^T A_{I_t}^T (A_{I_t} x_{I_t}^t - A_{I^*} x_{I^*}^*) - (x_{I^*}^*)^T A_{I^*}^T (A_{I_t} x_{I_t}^t - A_{I^*} x_{I^*}^*)), \\ &= -\frac{1}{2} (x_{MD_t}^*)^T A_{MD_t}^T (A_{I_t} x_{I_t}^t - A_{I^*} x_{I^*}^*), \quad \text{by (6)} \\ &= \frac{1}{2\eta} (x_{MD_t}^*)^T z_{MD_t}^{t+1}. \quad \text{by (3)} \end{aligned} \quad (7)$$

Hence,

$$\begin{aligned} \|x_{MD_t}^* - z_{MD_t}^{t+1}\|^2 &= \|x_{MD_t}^*\|^2 + \|z_{MD_t}^{t+1}\|^2 - 2(x_{MD_t}^*)^T z_{MD_t}^{t+1} \\ &= \|x_{MD_t}^*\|^2 + \|z_{MD_t}^{t+1}\|^2 - 4\eta f(x^t). \end{aligned} \quad (8)$$

That is,

$$\begin{aligned} 4\eta f(x^t) &\leq \|x_{MD_t}^*\|^2 + \|z_{MD_t}^{t+1}\|^2, \\ &\leq \|x_{MD_t}^*\|^2 + \|x_{FA_t}^t\|^2 + \|x_{CO_t}^t - x_{CO_t}^*\|^2 - \|x_{FA_t}^t\|^2 + \|z_{MD_t}^{t+1}\|^2, \\ &= \|x^t - x^*\|^2 + \|z_{MD_t}^{t+1}\|^2 - \|x_{FA_t}^t\|^2, \\ &\leq \frac{1}{1 - \delta_{2k}} \|A(x^t - x^*)\|^2 + \|z_{MD_t}^{t+1}\|^2 - \|x_{FA_t}^t\|^2, \quad \text{by RIP} \\ &= \frac{2}{1 - \delta_{2k}} f(x^t) + \|z_{MD_t}^{t+1}\|^2 - \|x_{FA_t}^t\|^2, \end{aligned}$$

where the third line follows from the fact that  $MD_t$ ,  $FA_t$ , and  $CO_t$  are disjoint sets.

As  $f(x^t) > 0$  and  $\delta_{2k} < 1 - \frac{1}{2\eta}$ , the above inequality implies

$$0 < 2(2\eta - \frac{1}{1 - \delta_{2k}})f(x^t) \leq \|z_{MD_t}^{t+1}\|^2 - \|x_{FA_t}^t\|^2.$$

□

Next, we provide a lemma that bounds the function value  $f(x^t)$  in terms of missed detections  $MD_t$  and also  $z_{MD_t}^{t+1}$ .

**Lemma 16.** *Let  $f(x^t) = \frac{1}{2}\|Ax^t - b\|^2$ ,  $b = Ax^*$ ,  $\delta_{2k} < 1 - \frac{1}{2\eta}$  and  $\eta < 1$ . Then, at each step,*

$$\frac{(1 - \eta)^2}{\eta} \|x_{MD_t}^*\|^2 \leq f(x^t) \leq \frac{1}{4\eta(1 - \eta)^2} \|z_{MD_t}^{t+1}\|^2 \quad (9)$$

*Proof.* Now, using Lemma 2 of [4] with  $I = MD_t$ ,  $J = I_t$ ,  $y = A_{MD_t}x_{MD_t}^*$  we get

$$\begin{aligned} f(x^t) &= \frac{1}{2}\|Ax^t - b\|^2 \\ &= \frac{1}{2}\|A_{I_t}(x^t - x^*)_{I_t} - A_{MD_t}x_{MD_t}^*\|^2 \end{aligned} \quad (10)$$

$$\begin{aligned} &\geq \frac{1}{2} \left(1 - \frac{\delta_{2k}}{1 - \delta_k}\right)^2 \|A_{MD_t}x_{MD_t}^*\|^2 \\ &\geq \frac{1}{2} \left(1 - \frac{\delta_{2k}}{1 - \delta_k}\right)^2 (1 - \delta_k) \|x_{MD_t}^*\|^2 \quad \text{by RIP} \\ &\geq \frac{1}{2} \left(1 - \frac{\delta_{2k}}{1 - \delta_{2k}}\right)^2 (1 - \delta_{2k}) \|x_{MD_t}^*\|^2 \\ &\geq \frac{(1 - 2\delta_{2k})^2}{2(1 - \delta_{2k})} \|x_{MD_t}^*\|^2 \end{aligned} \quad (11)$$

The assumption that  $\delta_{2k} < 1 - \frac{1}{2\eta}$  and  $\eta < 1$  implies that  $\delta_{2k} < 1 - \frac{1}{2\eta} < 1/2$ . The function  $\alpha \mapsto (1 - 2\alpha)^2/(2(1 - \alpha))$  is decreasing on  $[0, 1/2]$  and hence (11) implies

$$f(x^t) \geq \frac{\left(1 - 2(1 - \frac{1}{2\eta})\right)^2}{2(1 - 1 + \frac{1}{2\eta})} \|x_{MD_t}^*\|^2 = \frac{(1 - \eta)^2}{\eta} \|x_{MD_t}^*\|^2. \quad (12)$$

Next, using (7) and Cauchy-Schwarz inequality:

$$\|z_{MD_t}^{t+1}\|^2 \geq 4\eta^2 \frac{f(x^t)^2}{\|x_{MD_t}^*\|^2}. \quad (13)$$

The result now follows using the above equation with (12). □

**Lemma 17.** *Let  $\delta_{2k} < 1 - \frac{1}{2\eta}$  and  $1/2 < \eta < 1$ . Then assuming  $f(x^t) > 0$ , at least one new element is found i.e.  $F_t \neq \emptyset$ . Furthermore,  $\|y_{F_t}^{t+1}\|^2 > \frac{l}{k}cf(x^t)$ , where  $c = \min(4\eta(1 - \eta)^2, 2(2\eta - \frac{1}{1 - \delta_{2k}})) > 0$  is a constant.*

*Proof.* We consider the following three exhaustive cases:

1.  $|F_t| < l$  and  $|F_t| < |MD_t|$ : Here, we first argue that  $F_t \neq \emptyset$ . Assuming  $\delta_{2k} < 1 - 1/2\eta$ ,  $f(x_t) > 0$  and using Lemma 15,

$$\|z_{MD_t}^{t+1}\| > \|x_{FA_t}^t\|.$$

Also,  $|MD_t| = |FA_t|$ . Using (3),  $z_{FA_t}^{t+1} = x_{FA_t}^t$ . Now partial hard-thresholding selects top  $l$  elements from  $z^{t+1}$ , hence at least one element of  $x_{FA_t}^t$  must not have been selected in  $I_{t+1}$  (as  $MD_t$  should have at least one larger element). Hence  $F_t$  and  $L_t$  cannot be empty.

Let  $S \subseteq |MD_t \setminus F_t|$ , s.t.,  $|S| = |F_t| - |MD_t \cap F_t|$ . Now,

$$|S \cup (MD_t \cap F_t)| = |F_t|, \quad |(MD_t \setminus F_t) \setminus S| = |MD_t| - |F_t|.$$

Now, as  $y_{F_t}$  consists of top  $F_t$  elements of  $z_{MD_t}^{t+1}$ :

$$\|z_{S \cup (MD_t \cap F_t)}^{t+1}\|^2 \leq \|y_{F_t}\|^2. \quad (14)$$

Furthermore, since  $|F_t| < l$ , hence every element of  $z_{MD_t \setminus F_t}^{t+1}$  is smaller in magnitude than every element of  $x_{FA_t \setminus L_t}^t$ , otherwise that element should have been included in  $F_t$ . Furthermore,  $|MD_t| - |F_t| = |FA_t| - |L_t| \leq |FA_t \setminus L_t|$ . Hence,

$$\|z_{(MD_t \setminus F_t) \setminus S}^{t+1}\|^2 \leq \|x_{FA_t \setminus L_t}^t\|^2 \leq \|x_{FA_t}^t\|^2, \quad (15)$$

Adding (14) and (15), we get:

$$\|z_{MD_t}^{t+1}\|^2 \leq \|y_{F_t}^{t+1}\|^2 + \|x_{FA_t}^t\|^2. \quad (16)$$

Using above equation along with Lemma 15, we get:

$$\|y_{F_t}^{t+1}\|^2 \geq 2 \left( 2\eta - \frac{1}{1 - \delta_{2k}} \right) f(x^t). \quad (17)$$

Now, note that if  $|F_t| = 0$ , then  $y_{F_t}^{t+1} = 0$  implying that  $f(x^t) = 0$ . Hence, at least one new element is added, i.e.,  $y_{F_t}^{t+1} \neq \emptyset$ .

2.  $|F_t| = l < |MD_t|$ : By definition of  $y_{F_t}^{t+1}$ :

$$\frac{\|y_{F_t}^{t+1}\|^2}{|F_t|} \geq \frac{\|z_{MD_t}^{t+1}\|^2}{|MD_t|}.$$

Hence, using Lemma 16 and the fact that  $|F_t| = l$ :

$$\|y_{F_t}^{t+1}\|^2 \geq \frac{l}{|MD_t|} 4\eta(1 - \eta)^2 f(x^t) \geq \frac{l}{k} 4\eta(1 - \eta)^2 f(x^t), \quad (18)$$

as  $|MD_t| \leq k$ .

3.  $|F_t| \geq |MD_t|$ : Since,  $y_{F_t}^{t+1}$  is the top most elements of  $z^{t+1}$ . Hence, assuming  $|F_t| \geq |MD_t|$ ,

$$\|y_{F_t}^{t+1}\|^2 \geq \|z_{MD_t}^{t+1}\|^2.$$

Now, using Lemma 16:

$$\|y_{F_t}^{t+1}\|^2 \geq 4\eta(1 - \eta)^2 f(x^t). \quad (19)$$

We get the lemma by combining bounds for all the three cases, i.e., (17), (18), (19).  $\square$

Now we give a complete proof of Theorem 4.

*Proof.* We have,

$$\begin{aligned} f(y^{t+1}) - f(x^t) &= (y^{t+1} - x^t)^T A^T A(x^t - x^*) + 1/2 \|A(y^{t+1} - x^t)\|^2, \\ &\leq (y^{t+1} - x^t)^T A^T A(x^t - x^*) + \frac{(1 + \delta_{2l})}{2} (\|y_{F_t}^{t+1}\|^2 + \|x_{L_t}^t\|^2). \end{aligned} \quad (20)$$

where the second inequality follows by using the fact that  $y_{I_{t+1} \cap I_t}^{t+1} = x_{I_{t+1} \cap I_t}^t$  and using RIP of order  $2l$  (since  $|\text{supp}(y^{t+1} - x^t)| = |F_t \cup L_t| \leq 2l$ ).

Since  $x_{I_t}^t$  is obtained using least squares,

$$A_{I_t}^T A(x^t - x^*) = \mathbf{0}.$$

Thus,  $A_{L_t}^T A(x^t - x^*) = \mathbf{0}$ , because  $L_t \subseteq I_t$ . Next, note that

$$y_{F_t}^{t+1} = -\eta A_{F_t}^T A(x^t - x^*).$$

Hence,

$$f(y^{t+1}) - f(x^t) \leq \left( \frac{1 + \delta_{2l}}{2} - \frac{1}{\eta} \right) \|y_{F_t}^{t+1}\|^2 + \frac{1 + \delta_{2l}}{2} \|x_{L_t}^t\|^2. \quad (21)$$

Furthermore, since  $y^{t+1}$  is chosen based on the  $k$  largest entries in  $z_{J_{t+1}}^{t+1}$ , we have,

$$\|y_{F_t}^{t+1}\|^2 = \|z_{F_t}^{t+1}\|^2 \geq \|z_{L_t}^{t+1}\|^2 = \|x_{L_t}^t\|^2.$$

Plugging this into (21), we get:

$$f(y^{t+1}) - f(x^t) \leq \left( 1 + \delta_{2l} - \frac{1}{\eta} \right) \|y_{F_t}^{t+1}\|^2.$$

Now, using Lemma 17,  $\|y_{F_t}^{t+1}\|^2 \geq \frac{l}{k} c f(x^t)$  and therefore,

$$f(x^{t+1}) - f(x^t) \leq f(y^{t+1}) - f(x^t) \leq -\alpha \frac{l}{k} f(x^t)$$

where  $\alpha = c \left( 1 + \delta_{2l} - \frac{1}{\eta} \right) > 0$  since  $\eta(1 + \delta_{2l}) < 1$ . Hence,

$$f(x^{t+1}) \leq (1 - \alpha \frac{l}{k}) f(x^t) \leq e^{-\alpha \frac{l}{k}} f(x^t).$$

The above inequality shows that at each iteration OMPR ( $l$ ) reduces the objective function value by a fixed multiplicative factor. Furthermore, if  $x^0$  is chosen to have entries bounded by 1, then  $f(x^0) \leq (1 + \delta_{2k})k$ . Hence, after  $O(\frac{k}{l} \log((1 + \delta_{2k})k/\epsilon))$  iterations, the function value reduces to  $\epsilon$ , i.e.,  $f(x^t) \leq \epsilon$ .  $\square$

## B Proofs related to the LSH Section

**Lemma 18.** *Let  $\|x\| = 1$  for all points  $x$  in our database. Let  $x^*$  be the nearest neighbor to  $\mathbf{r}$  in  $L_2$  distance metric, and let  $\mathbf{r}^T x^* \geq c > 0$ . Then, a  $(1 + \alpha\epsilon)$ -nearest neighbor to  $\mathbf{r}$  is also a  $(1 - \epsilon)$ -similar neighbor to  $\mathbf{r}$ , where  $\alpha \leq \frac{2c}{1 + \mathbf{r}^T \mathbf{r} - 2c}$ .*

*Proof.* Let  $x'$  be a  $(1 + \alpha\epsilon)$ -nearest neighbor to  $\mathbf{r}$ , then:

$$\|x' - \mathbf{r}\|^2 \leq (1 + \alpha\epsilon) \|x^* - \mathbf{r}\|^2.$$

Using  $\|x'\| = \|x^*\| = 1$  and simplifying, we get:

$$\begin{aligned} \mathbf{r}^T x' &\geq (1 - \epsilon) \mathbf{r}^T x^* + (\alpha + 1) \epsilon \mathbf{r}^T x^* - \frac{\alpha\epsilon}{2} (1 + \mathbf{r}^T \mathbf{r}), \\ &\geq (1 - \epsilon) \mathbf{r}^T x^* + ((\alpha + 1)c - \frac{\alpha}{2} (1 + \mathbf{r}^T \mathbf{r})) \epsilon. \end{aligned}$$

Hence,  $x'$  is a  $(1 - \epsilon)$ -approximate similar neighbor to  $\mathbf{r}$  if:

$$(\alpha + 1)c \geq \frac{\alpha}{2} (1 + \mathbf{r}^T \mathbf{r}).$$

The result follows after simplification.  $\square$

We now provide a proof of Theorem 7.

*Proof.* Let us first consider a single step of OMPR. Now, similar to Lemma 15, we can show that if  $\delta_{2k} < 1/4 - \gamma$  and  $\eta = 1 - \gamma$ ,  $\gamma > 0$ , then  $\|z_{MD_t}^{t+1}\|^2 > \frac{3}{2} \|x_{FA_t}^t\|^2$ . Setting  $\epsilon = 1 - \sqrt{\frac{2}{3}}$ , implies that  $(1 - \epsilon) \max |z_{MD_t}^{t+1}| \geq \min |x_{FA_t}^t|$ , i.e., a  $(1 - \epsilon)$ -similar neighbor to  $\max |z_{MD_t}^{t+1}|$  will still lead to a constant decrease in the objective function.

So, the goal is to ensure that with probability  $1 - \delta$ ,  $\delta > 0$ , for all the  $O(k)$  iterations, our LSH method returns at least a  $(1 - \epsilon)$ -similar neighbor to  $\max |z_{MD_t}^{t+1}|$  where  $\epsilon = 1 - \sqrt{\frac{2}{3}}$ . To this end, we need to ensure that at each step  $t$ , LSH finds at least a  $(1 - \epsilon)$ -similar neighbor to  $\max |z_{MD_t}^{t+1}|$  with probability at least  $1 - \delta/k$ . Using Lemma 18, we need to find a  $(1 + \alpha\epsilon)$ -nearest neighbor to  $\max |z_{MD_t}^{t+1}|$ , where

$$\alpha \leq \frac{2c}{1 + \mathbf{r}^T \mathbf{r} - 2c},$$

and  $\mathbf{r}^T x^* \geq c$ . Using Lemma 17,  $\alpha = O(1/k)$ . Hence the result now follows using Theorem 6 (main text).  $\square$

## C Extension to Noisy Case

In this section, we consider the noisy case in which our objective function is  $f(x) = \frac{1}{2} \|Ax - b\|^2$ , where  $b = Ax^* + e$  and  $e \in \mathbb{R}^m$  is the “noise” vector.

Let  $I_t$  denote the support set of  $x^t$  and  $I^*$  be the support set of  $x^*$ . Define the sets

$$\begin{aligned} FA_t &= I_t \setminus I^* && \text{(false alarms)} \\ MD_t &= I^* \setminus I_t && \text{(missed detections)} \\ CO_t &= I_t \cap I^* && \text{(correct detections)}. \end{aligned}$$

**Lemma 19.** *Let  $f(x^t) \geq \frac{C}{2} \|e\|^2$  and  $\delta_{2k} < 1 - \frac{1}{2D\eta}$ , where  $D = \frac{C - \sqrt{C}}{(\sqrt{C} + 1)^2}$ . Then,*

$$\|z_{MD_t}^{t+1}\|^2 - \|x_{FA_t}^t\|^2 \geq cf(x^t),$$

where  $c = 2 \frac{(\sqrt{C} + 1)^2}{C} (2\eta D - \frac{1}{1 - \delta_{2k}}) > 0$ .

*Proof.* Since  $x_{I_t}^t$  is the solution to the least squares problem  $\min_x \|A_{I_t} x - b\|^2$ ,

$$A_{I_t}^T (A_{I_t} x_{I_t}^t - b) = 0. \tag{22}$$

Now, note that

$$\begin{aligned} f(x^t) &= \frac{1}{2} \|A_{I_t} x_{I_t}^t - b\|^2, \\ &= \frac{1}{2} ((x_{I_t}^t)^T A_{I_t}^T (A_{I_t} x_{I_t}^t - b) - b^T (A_{I_t} x_{I_t}^t - b)), \\ &= -\frac{1}{2} b^T (A_{I_t} x_{I_t}^t - b), \\ &= -\frac{1}{2} (x_{MD_t}^*)^T A_{MD_t}^T (A_{I_t} x_{I_t}^t - b) - \frac{1}{2} e^T (A_{I_t} x_{I_t}^t - b), \\ &= \frac{1}{2\eta} (x_{MD_t}^*)^T z_{MD_t}^{t+1} - \frac{1}{2} e^T (A_{I_t} x_{I_t}^t - b), \end{aligned} \tag{23}$$

where the third equality follows from (22).

Now,

$$\begin{aligned} \|x_{MD_t}^* - z_{MD_t}^{t+1}\|^2 &= \|x_{MD_t}^*\|^2 + \|z_{MD_t}^{t+1}\|^2 - 2(x_{MD_t}^*)^T z_{MD_t}^{t+1} \\ &= \|x_{MD_t}^*\|^2 + \|z_{MD_t}^{t+1}\|^2 - 4\eta(f(x^t) + \frac{1}{2} e^T (A_{I_t} x_{I_t}^t - b)) \end{aligned} \tag{24}$$

So,

$$\begin{aligned}
0 &\leq \|x_{MD_t}^*\|^2 + \|x_{FA_t}^t\|^2 - \|x_{FA_t}^t\|^2 + \|z_{MD_t}^{t+1}\|^2 - 4\eta(f(x^t) + \frac{1}{2}e^T(A_{I_t}x_{I_t}^t - b)), \\
&\leq \|x_{MD_t}^*\|^2 + \|x_{FA_t}^t\|^2 + \|x_{CO_t}^t - x_{CO_t}^*\|^2 - \|x_{FA_t}^t\|^2 + \|z_{MD_t}^{t+1}\|^2 - 4\eta(f(x^t) + \frac{1}{2}e^T(A_{I_t}x_{I_t}^t - b)), \\
&\leq \|x^t - x^*\|^2 - \|x_{FA_t}^t\|^2 + \|z_{MD_t}^{t+1}\|^2 - 4\eta(f(x^t) + \frac{1}{2}e^T(A_{I_t}x_{I_t}^t - b)), \\
&\leq \frac{1}{1 - \delta_{2k}} \|A(x^t - x^*)\|^2 - \|x_{FA_t}^t\|^2 + \|z_{MD_t}^{t+1}\|^2 - 4\eta(f(x^t) + \frac{1}{2}e^T(A_{I_t}x_{I_t}^t - b)), \\
&= \frac{1}{1 - \delta_{2k}} \|A(x^t - x^*)\|^2 - \|x_{FA_t}^t\|^2 + \|z_{MD_t}^{t+1}\|^2 - 4\eta(1 - \frac{1}{\sqrt{C}})f(x^t).
\end{aligned}$$

Now, by assumption:  $f(x^t) \geq \frac{C}{2}\|e\|^2$ . Hence,

$$\begin{aligned}
\|A(x^t - x^*)\| &\leq \|A(x^t - x^*) - e\| + \|e\|, \\
\|A(x^t - x^*)\|^2 &\leq 2(1 + \frac{1}{\sqrt{C}})^2 f(x^t).
\end{aligned}$$

Hence,

$$2 \left( 2\eta(1 - \frac{1}{\sqrt{C}}) - \frac{1}{1 - \delta_{2k}}(1 + \frac{1}{\sqrt{C}})^2 \right) f(x^t) \leq \|z_{MD_t}^{t+1}\|^2 - \|x_{FA_t}^t\|^2$$

Now, by assumption  $\delta_{2k} < 1 - \frac{1}{2D\eta}$ , where  $D = \frac{(\sqrt{C}+1)^2}{C-\sqrt{C}}$ . Hence,  $c = 2 \frac{(\sqrt{C}+1)^2}{C} (2\eta D - \frac{1}{1-\delta_{2k}}) > 0$ .  $\square$

Next, we provide a lemma that bounds the function value  $f(x^t)$  in terms of missed detection  $MD_t$  and also  $z_{MD_t}^{t+1}$ .

**Lemma 20.** *Let  $f(x^t) = \frac{1}{2}\|Ax^t - b\|^2 \geq \frac{C}{2}\|e\|^2$ ,  $b = Ax^* + e$ ,  $\delta_{2k} < 1 - \frac{1}{2D\eta}$  and  $D = \frac{C-\sqrt{C}}{(\sqrt{C}+1)^2}$ . Then, at each step,*

$$\frac{(1-\eta)^2 C}{\eta(\sqrt{C}+1)^2} \|x_{MD_t}^*\|^2 \leq f(x^t) \leq \frac{1}{4\eta(1-\eta)^2} \frac{(\sqrt{C}+1)^2}{(\sqrt{C}-1)^2} \|z_{MD_t}^{t+1}\|^2 \quad (25)$$

*Proof.* First we lower bound  $f(x^t)$ :

$$\begin{aligned}
\sqrt{f(x^t)} &= \frac{1}{\sqrt{2}} \|Ax^t - Ax^* - e\|, \\
&\geq \frac{1}{\sqrt{2}} (\|Ax^t - Ax^*\| - \|e\|), \\
&\geq \frac{1}{\sqrt{2}} \left( \min_{x: x_{I_t}=0} \|Ax - Ax^*\| - \|e\| \right), \\
&\geq \frac{1}{\sqrt{2}} \left( \frac{(1-2\delta_{2k})}{\sqrt{(1-\delta_{2k})}} \|x_{MD_t}^*\| - \|e\| \right),
\end{aligned}$$

where last equality follows from Lemma 16. Using the above inequality with  $f(x^t) \geq \frac{C}{2}\|e\|^2$ , we get:

$$f(x^t) \geq \frac{(1-2\delta_{2k})^2 C}{2(1-\delta_{2k})(\sqrt{C}+1)^2} \|x_{MD_t}^*\|^2. \quad (26)$$

The assumption that  $\delta_{2k} < 1 - \frac{1}{2D\eta}$  and  $D\eta < 1$  implies that  $\delta_{2k} < 1 - \frac{1}{2D\eta} < 1/2$ . The function  $\alpha \mapsto (1 - 2\alpha)^2/(2(1-\alpha))$  is decreasing on  $[0, 1/2]$  and hence the above equation implies

$$f(x^t) \geq \frac{(1-D\eta)^2}{D\eta} \|x_{MD_t}^*\|^2. \quad (27)$$

Now, we upper bound  $f(x^t)$ . Using definition of  $f(x^t)$ :

$$\frac{1}{2\eta}(x_{MD_t}^*)^T z_{MD_t}^{t+1} = f(x^t) + \frac{1}{2}e^T(A_{I_t}x_{I_t}^t - b).$$

Now, using Cauchy-Schwarz and  $f(x^t) \geq \frac{C}{2}\|e\|^2$ ,

$$|e^T(A_{I_t}x_{I_t}^t - b)| \leq \|e\| \|A_{I_t}x_{I_t}^t - b\| \leq \frac{2}{\sqrt{C}}f(x^t).$$

Hence,

$$\frac{1}{2\eta}\|x_{MD_t}^*\| \|z_{MD_t}^{t+1}\| \geq \frac{1}{2\eta}(x_{MD_t}^*)^T z_{MD_t}^{t+1} \geq (1 - \frac{1}{\sqrt{C}})f(x^t).$$

That is,

$$\|z_{MD_t}^{t+1}\|^2 \geq 4\eta^2 \left(1 - \frac{1}{\sqrt{C}}\right)^2 \frac{f(x^t)^2}{\|x_{MD_t}^*\|^2} \geq 4\eta(1 - D\eta)^2 \frac{(\sqrt{C}-1)^2}{CD} f(x^t), \quad (28)$$

where the second inequality follows from (27).  $\square$

Next, we present the following lemma that shows “enough” progress at each step:

**Lemma 21.** *Let  $f(x^t) \geq \frac{C}{2}\|e\|^2$ ,  $\eta < 1$  and  $\delta_{2k} < 1 - \frac{1}{2D\eta}$ , where  $D = 1 - \frac{1}{\sqrt{C}-1}$ . Then at least one new element is found i.e.  $F_t \neq \emptyset$ . Furthermore,  $\|y_{F_t}^{t+1}\| > \frac{1}{k}\alpha f(x^t)$ , where  $\alpha = \min(4\eta(1 - D\eta)^2 \frac{(\sqrt{C}-1)^2}{CD}, 2\frac{(\sqrt{C}+1)^2}{C}(2\eta D - \frac{1}{1-\delta_{2k}})) > 0$  is a constant.*

*Proof.* As for the exact case, we analyse the following three exhaustive cases:

1.  $|F_t| < l$  and  $|F_t| < |MD_t|$ : Here we use the exactly similar argument as the exact case to obtain the following inequality (see (16)):

$$\|z_{MD_t}^{t+1}\|^2 \leq \|y_{F_t}^{t+1}\|^2 + \|x_{FA_t}^t\|^2. \quad (29)$$

Using Lemma 19, we get:

$$\|y_{F_t}^{t+1}\|^2 \geq cf(x^t), \quad (30)$$

where  $c$  is as defined in Lemma 19. Now, note that if  $|F_t| = 0$ , then  $y_{F_t}^{t+1} = 0$  implying that  $f(x^t) = 0$ . Hence, at least one new element is added, i.e.,  $y_{F_t}^{t+1} \neq \emptyset$ .

2.  $|F_t| = l < |MD_t|$ : By definition of  $y_{F_t}^{t+1}$ :

$$\frac{\|y_{F_t}^{t+1}\|^2}{|F_t|} \geq \frac{\|z_{MD_t}^{t+1}\|^2}{|MD_t|}.$$

Hence, using Lemma 20 and the fact that  $|F_t| = l$ :

$$\|y_{F_t}^{t+1}\|^2 \geq \frac{l}{|MD_t|} 4\eta(1 - D\eta)^2 \frac{(\sqrt{C}-1)^2}{CD} f(x^t) \geq \frac{l}{k} 4\eta(1 - D\eta)^2 \frac{(\sqrt{C}-1)^2}{CD} f(x^t), \quad (31)$$

as  $|MD_t| \leq k$ .

3.  $|F_t| \geq |MD_t|$ : Since,  $y_{F_t}^{t+1}$  is the top most elements of  $z^{t+1}$ . Hence, assuming  $|F_t| \geq |MD_t|$ ,

$$\|y_{F_t}^{t+1}\|^2 \geq \|z_{MD_t}^{t+1}\|^2.$$

Now, using Lemma 20:

$$\|y_{F_t}^{t+1}\|^2 \geq 4\eta(1 - D\eta)^2 \frac{(\sqrt{C}-1)^2}{CD} f(x^t). \quad (32)$$

We get the lemma by combining bounds for all the three cases, i.e., (30), (31), (32).  $\square$

Now, we provide a proof of Theorem 2.

*Proof.* We have,

$$\begin{aligned} f(y^{t+1}) - f(x^t) &= (y^{t+1} - x^t)^T A^T (Ax^t - b) + 1/2 \|A(y^{t+1} - x^t)\|^2, \\ &\leq (y^{t+1} - x^t)^T A^T (Ax^t - b) + \frac{(1 + \delta_{2l})}{2} (\|y_{F_t}^{t+1}\|^2 + \|x_{L_t}^t\|^2). \end{aligned} \quad (33)$$

where the second inequality follows by using the fact that  $y_{I_{t+1} \cap I_t}^{t+1} = x_{I_{t+1} \cap I_t}^t$  and using RIP of order  $2l$  (since  $|\text{supp}(y^{t+1} - x^t)| = |F_t \cup L_t| \leq 2l$ ).

Since  $x_{I_t}^t$  is obtained using least squares,

$$A_{I_t}^T (Ax^t - b) = \mathbf{0}.$$

That is,  $A_{L_t}^T (Ax^t - b) = \mathbf{0}$ , because  $L_t \subseteq I_t$ . Next, note that

$$y_{F_t}^{t+1} = -\eta A_{F_t}^T (Ax^t - b).$$

Hence,

$$f(y^{t+1}) - f(x^t) \leq \left( \frac{1 + \delta_{2l}}{2} - \frac{1}{\eta} \right) \|y_{F_t}^{t+1}\|^2 + \frac{1 + \delta_{2l}}{2} \|x_{L_t}^t\|^2. \quad (34)$$

Furthermore, since  $y^{t+1}$  is chosen based on largest entries in  $z_{J_{t+1}}^{t+1}$ , we have,

$$\|y_{F_t}^{t+1}\|^2 = \|z_{F_t}^{t+1}\|^2 \geq \|z_{L_t}^{t+1}\|^2 = \|x_{L_t}^t\|^2.$$

Plugging this into (34), we get:

$$f(y^{t+1}) - f(x^t) \leq \left( 1 + \delta_{2l} - \frac{1}{\eta} \right) \|y_{F_t}^{t+1}\|^2.$$

Now, using Lemma 21,  $\|y_{F_t}^{t+1}\|^2 \geq \alpha f(x^t) > 0$  and therefore,

$$\begin{aligned} f(x^{t+1}) - f(x^t) &\leq f(y^{t+1}) - f(x^t) \\ &\leq -c' \frac{l}{k} f(x^t), \end{aligned}$$

where  $c' = \frac{1 - \eta(1 + \delta_{2l})}{\eta(1 + \delta_{2l})} \alpha > 0$  since  $\eta(1 + \delta_{2l}) < 1$ . The above inequality shows that at each iteration OMPR ( $l$ ) reduces the objective function value by a fixed multiplicative factor. Furthermore, if  $x^0$  is chosen to have entries bounded by 1, then  $f(x^0) \leq O((1 + \delta_{2k})k + \|e\|^2)$ . Hence, after  $O(\frac{k}{l} \log((k + \|e\|^2)/\epsilon))$  iterations, the function value reduces to  $C\|e\|^2/2 + \epsilon$ .  $\square$

## D Analysis of 2-stage Algorithms

In this section, we consider the family of two-stage hard thresholding algorithms (see Algorithm 3) introduced by [17].

We now provide a simple analysis for the general two-stage hard thresholding algorithms. We first present a few technical lemmas that we will need for our proof.

**Lemma 22.** Let  $b = Ax^*$ , where  $I^* = \text{supp}(x^*)$ . Also, let  $x = \text{argmin}_{\text{supp}(x)=I} \|Ax - b\|^2$ . Then,

$$\sqrt{\|(x - x^*)_{I \cap I^*}\|^2 + \|x_{I \setminus I^*}\|^2} = \|(x - x^*)_I\| \leq \frac{\delta_{|I \cup I^*|}}{\sqrt{1 - \delta_{|I \cup I^*|}^2}} \|x_{I^* \setminus I}^*\|$$

---

**Algorithm 3** Two-stage( $l$ )

---

```
1: Input: matrix  $A$ , vector  $b$ , sparsity level  $k$ 
2: Initialize  $x^1$ 
3: for  $t = 1$  to  $T$  do
4:    $\text{top}_{t+1} \leftarrow$  indices of top  $l$  elements of  $|A^T(Ax^t - b)|$ 
5:    $J_{t+1} \leftarrow I_t \cup \text{top}_{t+1}$ 
6:    $z_{J_{t+1}}^{t+1} \leftarrow A_{J_{t+1}} \setminus b, z_{\bar{J}_{t+1}}^{t+1} \leftarrow \mathbf{0}$ 
7:    $y^{t+1} \leftarrow H_k(z^{t+1})$ 
8:    $I_{t+1} \leftarrow \text{supp}(y^{t+1})$ 
9:    $x_{I_{t+1}}^{t+1} \leftarrow A_{I_{t+1}} \setminus b, x_{\bar{I}_{t+1}}^{t+1} \leftarrow \mathbf{0}$ 
10: end for
```

---

*Proof.* A similar inequality appears in [10] and we rewrite the proof here. Since  $x_I$  is the solution to  $\min_u \|A_I u - b\|^2$ ,  
 $A_I^T(A_I x_I - b) = 0$ . (35)

In the exact case,  $b = Ax^*$ . Hence,

$$\|(x - x^*)_I\|^2 = [(x - x^*)_I \ 0]^T \begin{bmatrix} (x - x^*)_I \\ -x_{I^* \setminus I}^* \end{bmatrix} \quad (36)$$

Now, using (35):

$$0 = [(x - x^*)_I \ 0]^T A_G^T A_G \begin{bmatrix} (x - x^*)_I \\ -x_{I^* \setminus I}^* \end{bmatrix}, \quad (37)$$

where  $G = [I \ I^* \setminus I]$ . Subtracting (37) from (36) we get,

$$\begin{aligned} \|(x - x^*)_I\|^2 &= [(x - x^*)_I \ 0]^T (I - A_G^T A_G) \begin{bmatrix} (x - x^*)_I \\ -x_{I^* \setminus I}^* \end{bmatrix}, \\ &\leq \delta_{2k} \|(x - x^*)_I\| \sqrt{\|(x - x^*)_I\|^2 + \|x_{I^* \setminus I}^*\|^2}, \end{aligned} \quad (38)$$

where the second inequality follows using Lemma 13. Lemma follows by just rearranging terms now. □

We now present our main theorem and its proof for two-stage thresholding algorithms.

**Theorem 23.** Suppose the vector  $x^* \in \mathbb{R}^n$  is  $k$ -sparse and binary. Then Two-stage( $l$ ) recovers  $x^*$  from measurements  $b = Ax^*$  in  $O(k)$  iterations provided:

$$\delta_{2k+l} \leq .35$$

*Proof.* As  $z^{t+1}$  is the least squares solution over support set  $J_{t+1}$ , hence:

$$f(z^{t+1}) - f(x^t) \leq f(s^{t+1}) - f(x^t), \quad (39)$$

where  $s_{J_{t+1}}^{t+1} = (x^t - \eta A^T(Ax^t - b))_{J_{t+1}}$ ,  $\eta = \frac{1}{1+\delta_l}$  and  $s_{\bar{J}_{t+1}}^{t+1} = 0$ .

Now,

$$f(s^{t+1}) - f(x^t) = (s^{t+1} - x^t)^T A^T(Ax^t - b) + \frac{1}{2} \|As^{t+1} - Ax^t\|^2. \quad (40)$$

Now, as  $x^t$  is the least squares solution over  $I_t$ . Hence,  $A_{I_t}^T(Ax^t - b) = 0$ . Hence,

$$(s^{t+1} - x^t)_{I_t} = 0, \quad (s^{t+1} - x^t)_{\text{top}_{t+1}} = -\eta A_{\text{top}_{t+1}}^T(Ax^t - b), \quad (s^{t+1} - x^t)_{\bar{J}_{t+1}} = 0. \quad (41)$$

Using (40) and (41):

$$\begin{aligned} f(s^{t+1}) - f(x^t) &= -\eta \|A_{\text{top}_{t+1}}^T(Ax^t - b)\|^2 + \frac{\eta^2}{2} \|A_{\text{top}_{t+1}} A_{\text{top}_{t+1}}^T(Ax^t - b)\|^2, \\ &\leq -\eta \|A_{\text{top}_{t+1}}^T(Ax^t - b)\|^2 + \frac{\eta^2(1+\delta_l)}{2} \|A_{\text{top}_{t+1}}^T(Ax^t - b)\|^2, \\ &= -\frac{\eta}{2} \|A_{\text{top}_{t+1}}^T(Ax^t - b)\|^2. \end{aligned} \quad (42)$$

Now, let  $MD_t$  be the set of missed detections, i.e.,  $MD_t = I^* \setminus I^t$ . Then, by definition of  $\text{top}_{t+1}$ :

$$\|A_{\text{top}_{t+1}}^T(Ax^t - b)\|^2 \geq \min\left(1, \frac{l}{|MD_t|}\right) \|A_{MD_t}^T(Ax^t - b)\|^2. \quad (43)$$

Furthermore,

$$\begin{aligned} \|A_{MD_t}^T(Ax^t - b)\| &= \|A_{MD_t}^T A_{MD_t} x_{MD_t}^* - A_{MD_t}^T A_{I_t}(x^t - x^*)_{I_t}\|, \\ &\geq \|A_{MD_t}^T A_{MD_t} x_{MD_t}^*\| - \|A_{MD_t}^T A_{I_t}(x^t - x^*)_{I_t}\|, \\ &\geq (1 - \delta_k) \|x_{MD_t}^*\| - \frac{\delta_{2k}^2}{\sqrt{1 - \delta_{2k}^2}} \|x_{MD_t}^*\|, \end{aligned} \quad (44)$$

where last inequality follows using Lemma 14 and Lemma 22.

Hence, using (42), (43), and (44):

$$f(z^{t+1}) - f(x^t) \leq f(s^{t+1}) - f(x^t) \leq -\frac{1}{2(1 + \delta_l)} \min\left(1, \frac{l}{|MD_t|}\right) \left(1 - \delta_k - \frac{\delta_{2k}^2}{\sqrt{1 - \delta_{2k}^2}}\right)^2 \|x_{MD_t}^*\|^2. \quad (45)$$

Next, we upper bound increase in the objective function by removing  $l$  elements from  $z^{t+1}$ .

$$\begin{aligned} f(y^{t+1}) - f(z^{t+1}) &= (y^{t+1} - z^{t+1})^T A^T (Az^{t+1} - b) + \frac{1}{2} \|Ay^{t+1} - Az^{t+1}\|^2, \\ &= \frac{1}{2} \|Ay^{t+1} - Az^{t+1}\|^2, \\ &\leq \frac{1 + \delta_l}{2} \|z_{J_{t+1} \setminus I_{t+1}}^{t+1}\|^2, \end{aligned} \quad (46)$$

where the second equation follows as  $z^{t+1}$  is a least squares solution, and both  $y^{t+1}$ ,  $z^{t+1}$ 's support is a subset of  $J_{t+1}$ . The third equation follows from RIP and the fact that  $z_{I_{t+1}}^{t+1} = y_{I_{t+1}}^{t+1}$ .

Now, using Lemma 22:

$$\|z_{J_{t+1} \setminus I^*}^{t+1}\|^2 \leq \frac{\delta_{2k+l}^2}{1 - \delta_{2k+l}^2} \|x_{I^* \setminus J_{t+1}}^*\|^2. \quad (47)$$

Furthermore,  $|J_{t+1} \setminus I_{t+1}| = l \leq |J_{t+1} \setminus I^*|$ . Hence, by definition of  $I_{t+1}$ ,

$$\|z_{J_{t+1} \setminus I_{t+1}}^{t+1}\|^2 \leq \frac{l}{|J_{t+1} \setminus I^*|} \|z_{J_{t+1} \setminus I^*}^{t+1}\|^2.$$

Using above equation and (47), we get:

$$\|z_{J_{t+1} \setminus I_{t+1}}^{t+1}\|^2 \leq \frac{l}{|J_{t+1} \setminus I^*|} \frac{\delta_{2k+l}^2}{1 - \delta_{2k+l}^2} \|x_{I^* \setminus J_{t+1}}^*\|^2, \quad (48)$$

Also,  $|J_{t+1} \setminus I^*| = l + |I^* \setminus J_{t+1}| \leq l + |MD_t|$ . Using (46), (48), and the fact that  $f(x^{t+1}) \leq f(y^{t+1})$  and each  $x_{I^*}^* = 1$ :

$$f(x^{t+1}) - f(z^{t+1}) \leq \frac{l}{l + |I^* \setminus J_{t+1}|} \frac{1 + \delta_l}{2} \frac{\delta_{2k+l}^2}{1 - \delta_{2k+l}^2} |I^* \setminus J_{t+1}|. \quad (49)$$

Adding (45) and (49), we get:

$$f(x^{t+1}) - f(x^t) \leq -\frac{1}{2(1 + \delta_l)} \left( \min(|MD_t|, l) \left(1 - \delta_k - \frac{\delta_{2k}^2}{\sqrt{1 - \delta_{2k}^2}}\right)^2 - \frac{l \cdot |I^* \setminus J_{t+1}|}{l + |I^* \setminus J_{t+1}|} \frac{(1 + \delta_l)^2 \delta_{2k+l}^2}{1 - \delta_{2k+l}^2} \right). \quad (50)$$

Now,  $\frac{l \cdot |I^* \setminus J_{t+1}|}{l + |I^* \setminus J_{t+1}|} \leq \min(l, |I^* \setminus J_{t+1}|) \leq \min(l, |MD_t|)$ .

Hence,

$$f(x^{t+1}) - f(x^t) \leq -\frac{\min(l, |MD_t|)}{2(1 + \delta_l)} \left( \left( 1 - \delta_k - \frac{\delta_{2k}^2}{\sqrt{1 - \delta_{2k}^2}} \right)^2 - \frac{(1 + \delta_l)^2 \delta_{2k+l}^2}{1 - \delta_{2k+l}^2} \right). \quad (51)$$

Now consider:

$$\begin{aligned} \left( \left( 1 - \delta_k - \frac{\delta_{2k}^2}{\sqrt{1 - \delta_{2k}^2}} \right)^2 - \frac{(1 + \delta_l)^2 \delta_{2k+l}^2}{1 - \delta_{2k+l}^2} \right) &\geq \frac{1}{1 - \delta_{2k+l}^2} \left( ((1 - \delta_{2k+l}) \sqrt{1 - \delta_{2k+l}^2} - \delta_{2k+l}^2)^2 - (1 + \delta_{2k+l})^2 \delta_{2k+l}^2 \right), \\ &> 0.01, \end{aligned} \quad (52)$$

where the second inequality follows by substituting  $\delta_{2k+1} \leq .35$ .

Hence, using (51) and (52), we have:

$$f(x^{t+1}) \leq f(x^t) - \min(l, |MD_t|) \cdot 0.0001. \quad (53)$$

The above equation guarantees convergence to the optima in at least  $O(k)$  steps although faster convergence can be shown for larger  $k$ .  $\square$

**Corollary 24.** *Cosamp converges to the optima provided*

$$\delta_{4k} \leq 0.35.$$

**Corollary 25.** *Subspace-Pursuit converges to the optima provided*

$$\delta_{3k} \leq 0.35.$$

Note that CoSamp's analysis given by [19] requires  $\delta_{4k} \leq 0.1$  while Subspace pursuit's analysis given by [4] requires  $\delta_{3k} \leq 0.205$ . Note that our generic analysis provides significantly better guarantees for both the methods.
